# Supplementary material for: Energy transfer dynamics and time resolved photoluminescence in BaWO4:Eu3+nanophosphors synthesized by mechanical activation
Source: Royal Society of Chemistry journal article supplement (doi:10.1039/c7nj01249g), 2017-01-01
Supplement: c7nj01249g1.pdf [file c7nj01249g1.pdf]

**Electronic Supplementary Information (ESI) for New Journal of Chemistry:**

**Energy transfer dynamics and time resolved photoluminescence in  
BaWO<sub>4</sub>:Eu<sup>3+</sup> nanophosphors synthesized by mechanical activation**

Paramananda Jena<sup>a</sup>, Santosh K. Gupta<sup>b\*</sup>, Narendra Kumar Verma<sup>a</sup>, Akhilesh Kumar Singh<sup>a\*</sup>, R.M. Kadam<sup>b</sup>

<sup>a</sup>School of Materials Science and Technology, Indian Institute of Technology (Banaras Hindu University), Varanasi-221005, Uttar Pradesh, INDIA

<sup>b</sup>Radiochemistry Division, Bhabha Atomic Research Centre, Trombay, Mumbai-400085, INDIA.

Corresponding Author: Email: [aksingh.mst@itbhu.ac.in](mailto:aksingh.mst@itbhu.ac.in), (AKS), [santoshg@barc.gov.in](mailto:santoshg@barc.gov.in), [santufrnd@gmail.com](mailto:santufrnd@gmail.com), (SKG)

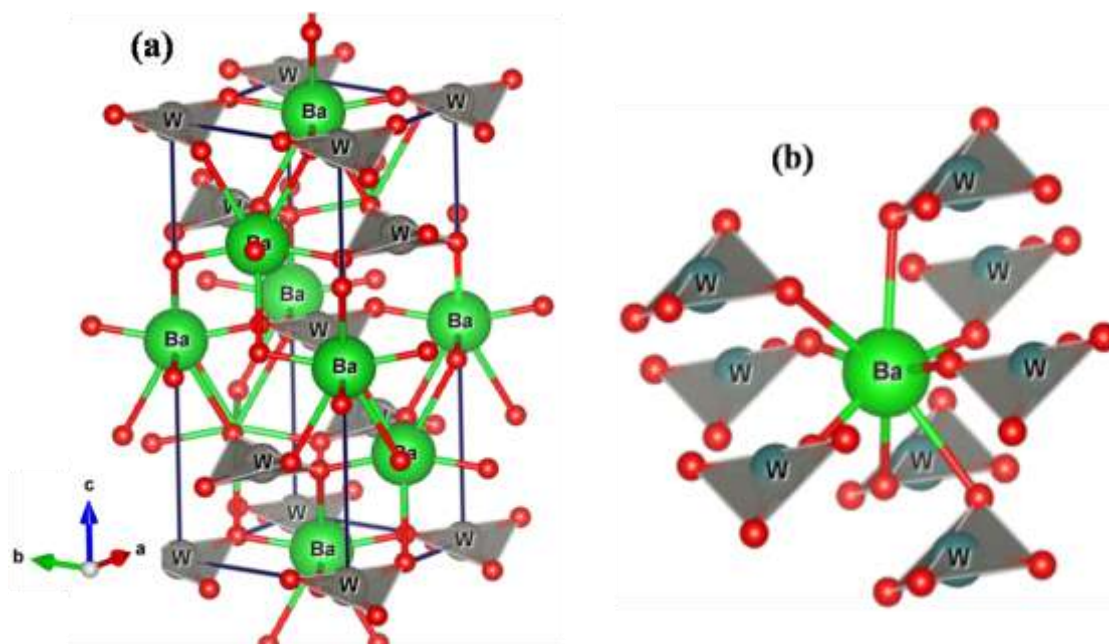

Figure S1 (a) Schematic representation of (a) Scheelite type tetragonal unit cell of BaWO<sub>4</sub> and (b) Ba site coordination environment in [BaO<sub>8</sub>] cluster.

Table A Refined structural parameters of the pure and various compositions of BaWO<sub>4</sub>:Eu<sup>3+</sup> samples obtained from Rietveld analysis.

| <b>BWO</b>          |           |            |            |           |        |
|---------------------|-----------|------------|------------|-----------|--------|
| Atom                | X         | Y          | Z          | Biso.     | Occup. |
| Ba/Eu               | 0.00      | 0.2500     | 0.62500    | 0.084(1)  | 1/0    |
| W                   | 0.00      | 0.2500     | 0.12500    | 2.515(1)  | 1      |
| O                   | 0.253(2)  | 0.1134 (2) | 0.0899 (8) | 0.00      | 4      |
| <b>BEW 0.1 mol%</b> |           |            |            |           |        |
| Ba                  | 0.00      | 0.250      | 0.625      | 0.00      | 0.999  |
| Eu                  | 0.00      | 0.250      | 0.125      | 1.931 (2) | 0.001  |
| W                   | 0.00      | 0.250      | 0.125      | 1.931 (2) | 1      |
| O                   | 0.249 (2) | 0.112 (2)  | 0.095(8)   | 0.00      | 4.0005 |
| <b>BEW 0.5 mol%</b> |           |            |            |           |        |
| Ba                  | 0.00      | 0.250      | 0.625      | 1.042(1)  | 0.995  |
| Eu                  | 0.00      | 0.250      | 0.125      | 0.970(8)  | 0.005  |
| W                   | 0.00      | 0.250      | 0.125      | 0.970(8)  | 1      |
| O                   | 0.248(2)  | 0.113(2)   | 0.077(8)   | 1.274(5)  | 4.0025 |
| <b>BEW 1 mol%</b>   |           |            |            |           |        |
| Ba                  | 0.00      | 0.250      | 0.625      | 0.709(1)  | 0.990  |
| Eu                  | 0.00      | 0.250      | 0.125      | 1.126(9)  | 0.010  |
| W                   | 0.00      | 0.250      | 0.125      | 1.126(9)  | 1      |
| O                   | 0.2504(2) | 0.11004(2) | 0.0801(8)  | 0.868(5)  | 4.005  |
| <b>BEW 2 mol%</b>   |           |            |            |           |        |
| Ba                  | 0.00      | 0.250      | 0.625      | 0.00      | 0.980  |
| Eu                  | 0.00      | 0.250      | 0.125      | 2.436(1)  | 0.020  |
| W                   | 0.00      | 0.250      | 0.125      | 2.436(1)  | 1      |
| O                   | 0.258(2)  | 0.10994(2) | 0.10167(1) | 0.00      | 4.01   |
| <b>BEW 5 mol%</b>   |           |            |            |           |        |
| Ba                  | 0.00      | 0.250      | 0.625      | 0.00      | 0.95   |
| Eu                  | 0.00      | 0.250      | 0.125      | 3.063(1)  | 0.05   |
| W                   | 0.00      | 0.250      | 0.125      | 2.184(1)  | 1      |
| O                   | 0.271(2)  | 0.1004(2)  | 0.09703(1) | 1.201(5)  | 4.025  |

Table B Band positions of the Raman active modes ( $\text{cm}^{-1}$ ) of pure and  $\text{BaWO}_4:\text{Eu}^{3+}$  samples obtained from the present work (Fig.5) along with the reported literature results.

| Raman active modes ( $\text{cm}^{-1}$ ) | Present work $\text{BaWO}_4$ & $\text{Eu}^{3+}$ doped $\text{BaWO}_4$ calcined at $1100\text{ }^\circ\text{C}$ ( $\text{cm}^{-1}$ ) | Band positions in $\text{cm}^{-1}$ |     |         |       |
|-----------------------------------------|-------------------------------------------------------------------------------------------------------------------------------------|------------------------------------|-----|---------|-------|
|                                         |                                                                                                                                     | 14                                 | 44  | 45      | 46    |
| $\nu_1 (\text{A}_g)$                    | 926                                                                                                                                 | 924                                | 925 | 926     | 920.3 |
| $\nu_3 (\text{B}_g)$                    | 831                                                                                                                                 | 830                                | 831 | 831     | 829   |
| $\nu_3 (\text{E}_g)$                    | 794                                                                                                                                 | 793                                | 795 | 795     | 790   |
| $\nu_4 (\text{E}_g)$                    | 354                                                                                                                                 | 354                                | 353 | 352     | -     |
| $\nu_4 (\text{B}_g)$                    | 344                                                                                                                                 | 344                                | 345 | 344     | -     |
| $\nu_2 (\text{A}_g/\text{B}_g)$         | 332                                                                                                                                 | 330/332                            | 332 | 331/332 | 330   |
| R ( $\text{E}_g$ )                      | 191                                                                                                                                 | 190                                | 191 | 191     | 188   |
| R ( $\text{A}_g$ )                      | 152                                                                                                                                 | 150                                | 150 | 150     | -     |
| T ( $\text{B}_g$ )                      | 135                                                                                                                                 | 132                                | 132 | 133     | -     |
| T ( $\text{E}_g$ )                      | 102                                                                                                                                 | 101                                | 101 | 101     | 98    |
| T ( $\text{B}_g$ )                      | 74                                                                                                                                  | 74                                 | 75  | 74      | 72    |
| T ( $\text{E}_g$ )                      | 62                                                                                                                                  | 62                                 | 63  | 63      | 60    |

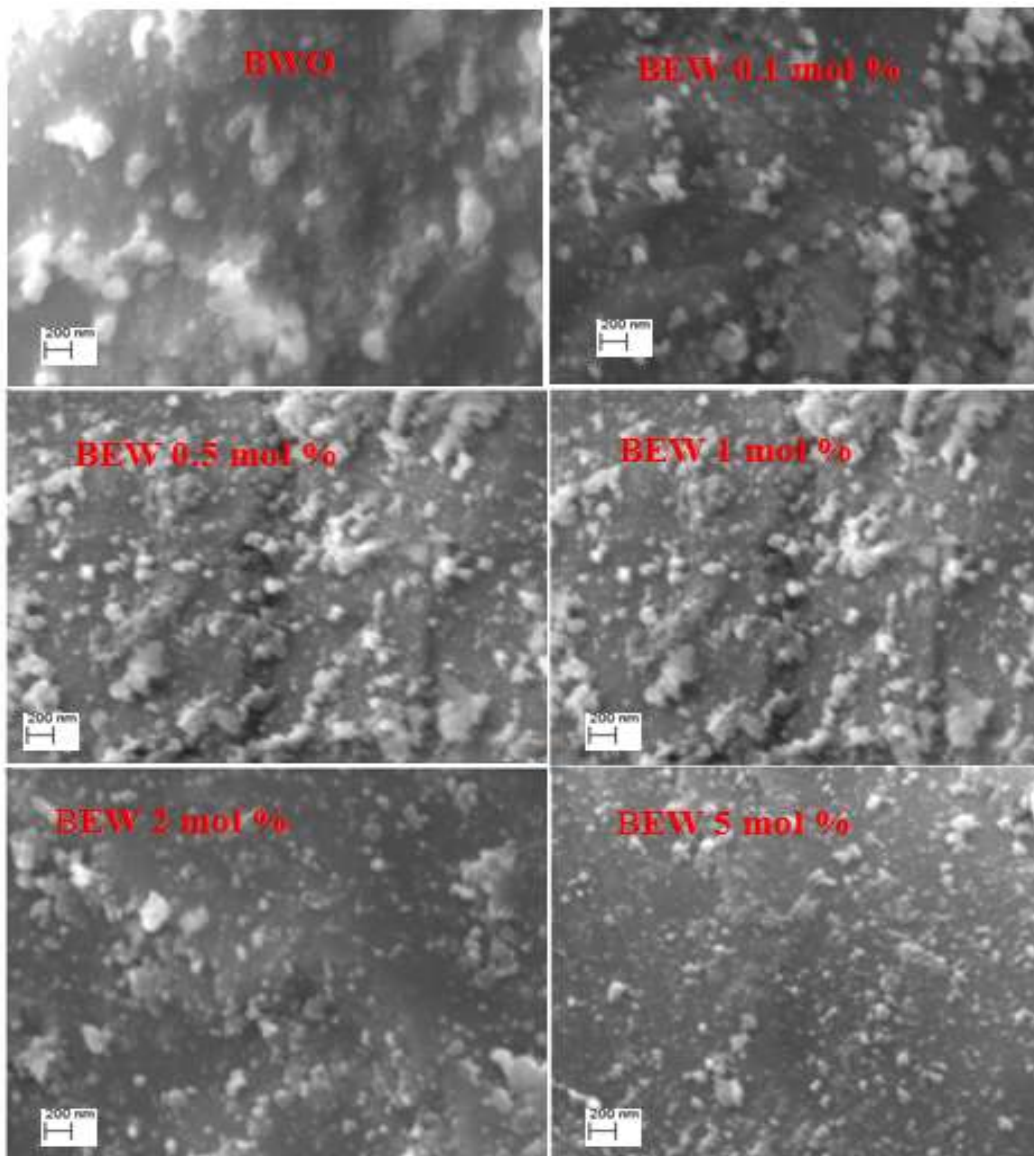

Figure S2 SEM images of the pure and various compositions of  $\text{BaWO}_4:\text{Eu}^{3+}$  samples calcined at  $1100\text{ }^\circ\text{C}$ .

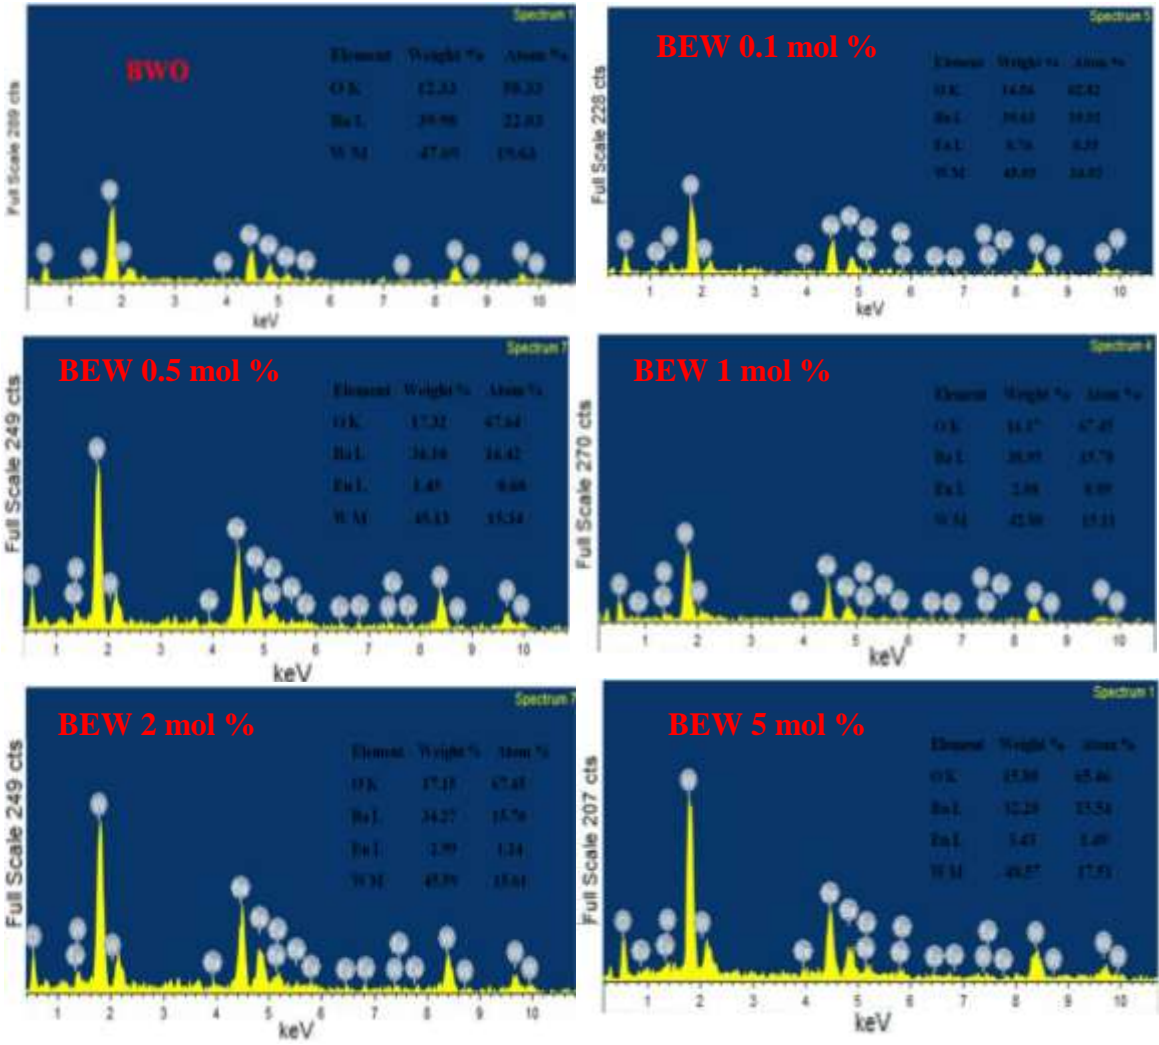

Figure S3 Obtained EDX spectra along with elemental compositions of the pure and BaWO<sub>4</sub> : Eu<sup>3+</sup> samples calcined at 1100 °C.
